# Supplementary material for: Radioprotective effect of the anti-diabetic drug metformin
Source: PubMed Central journal article supplement (PMC11265658; doi:10.1371/journal.pone.0307598), 2024-07-23

S1B Fig

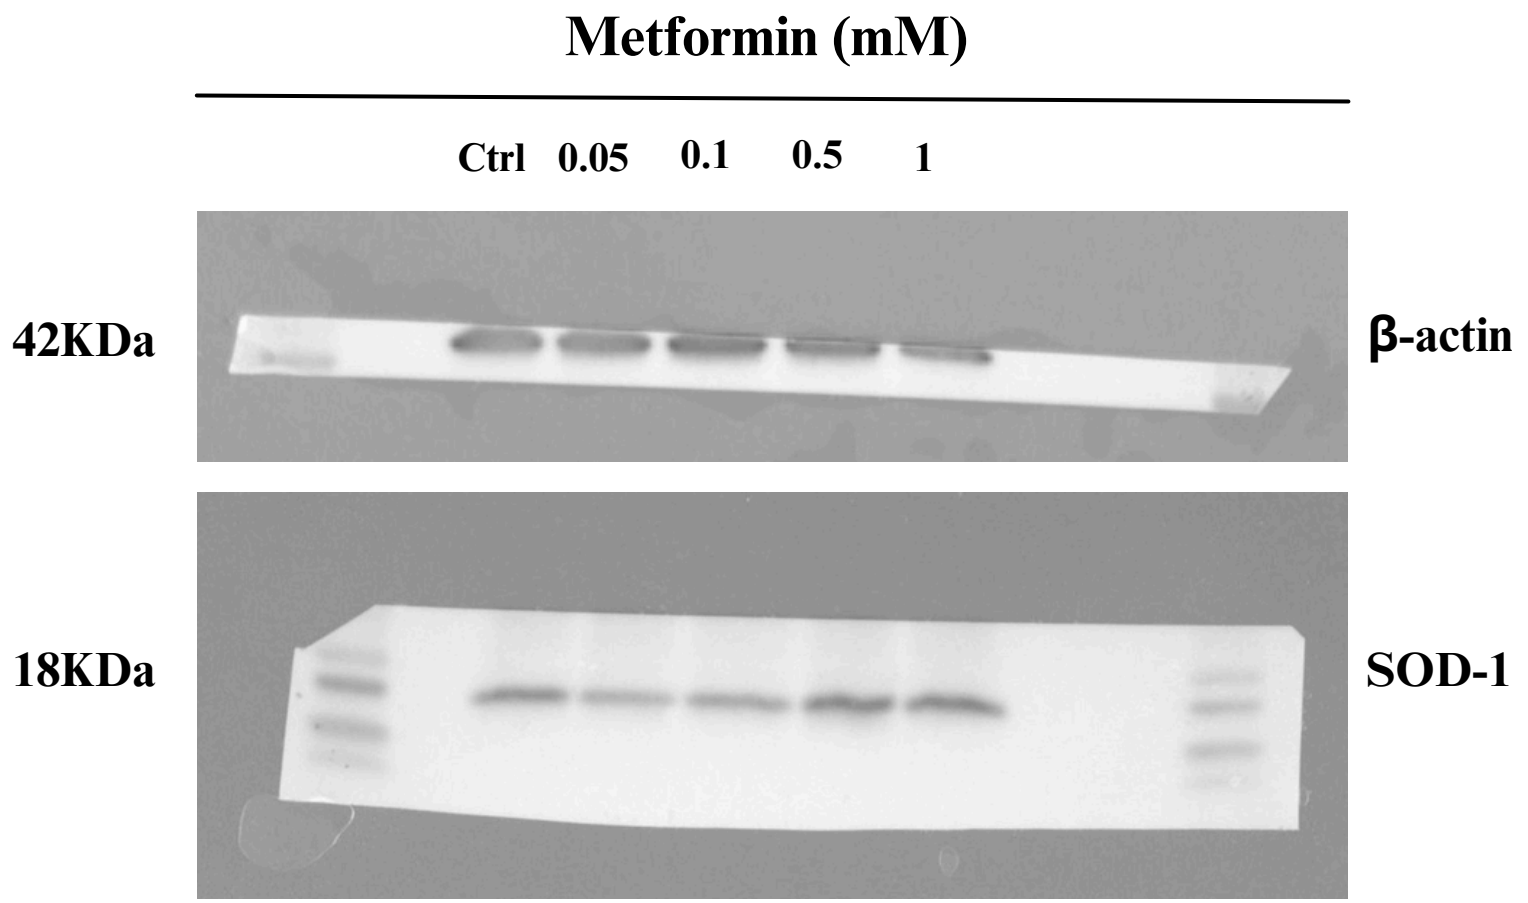

S1C Fig

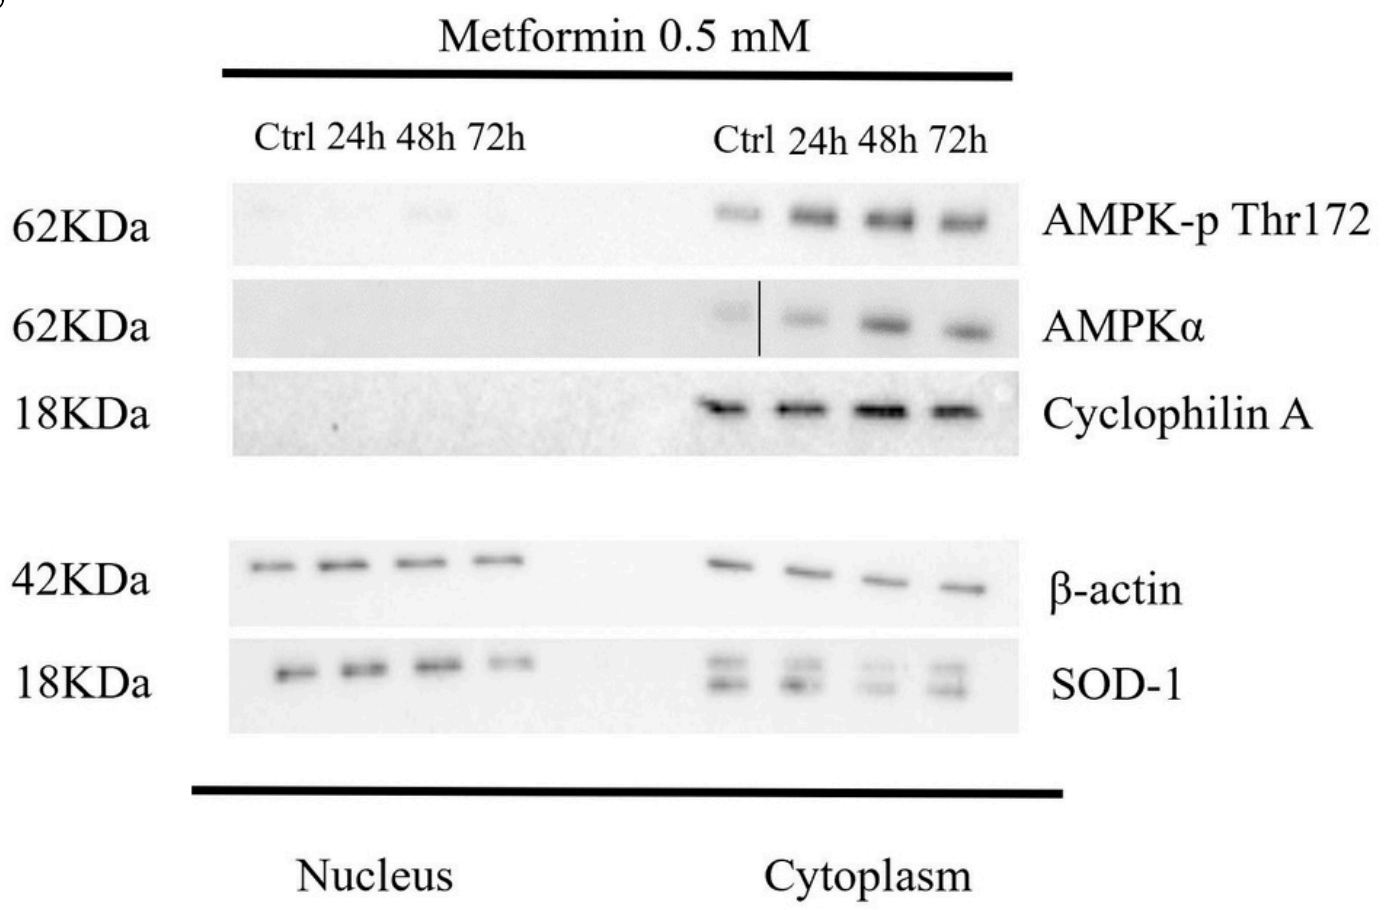

Original AMPKα from S1C Fig

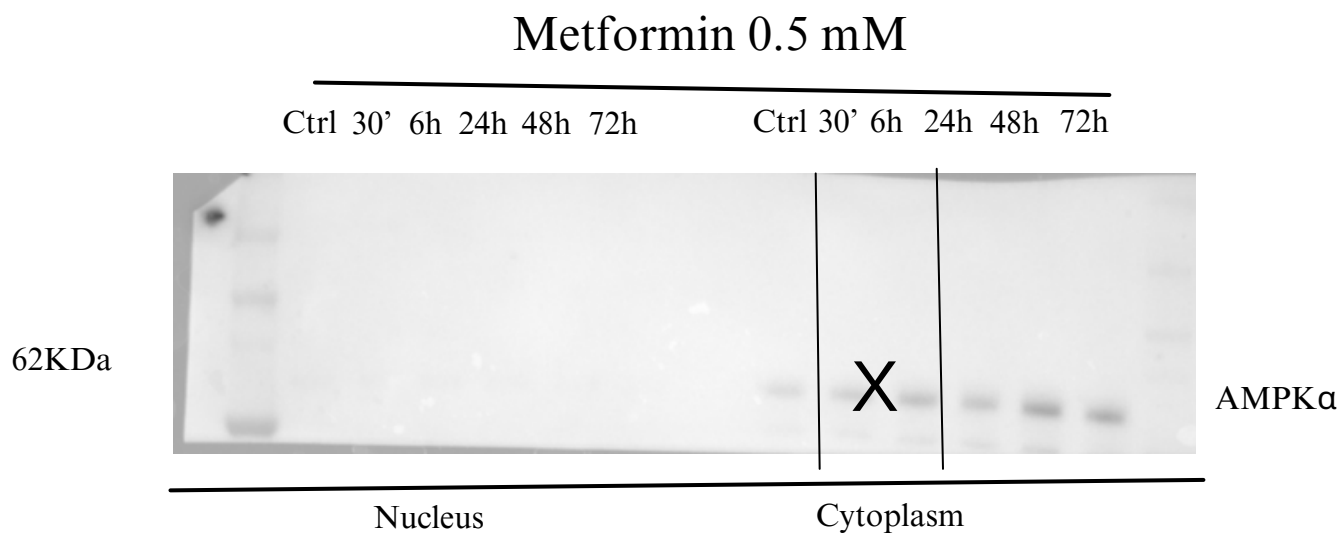

Original blots of S1C  
Fig

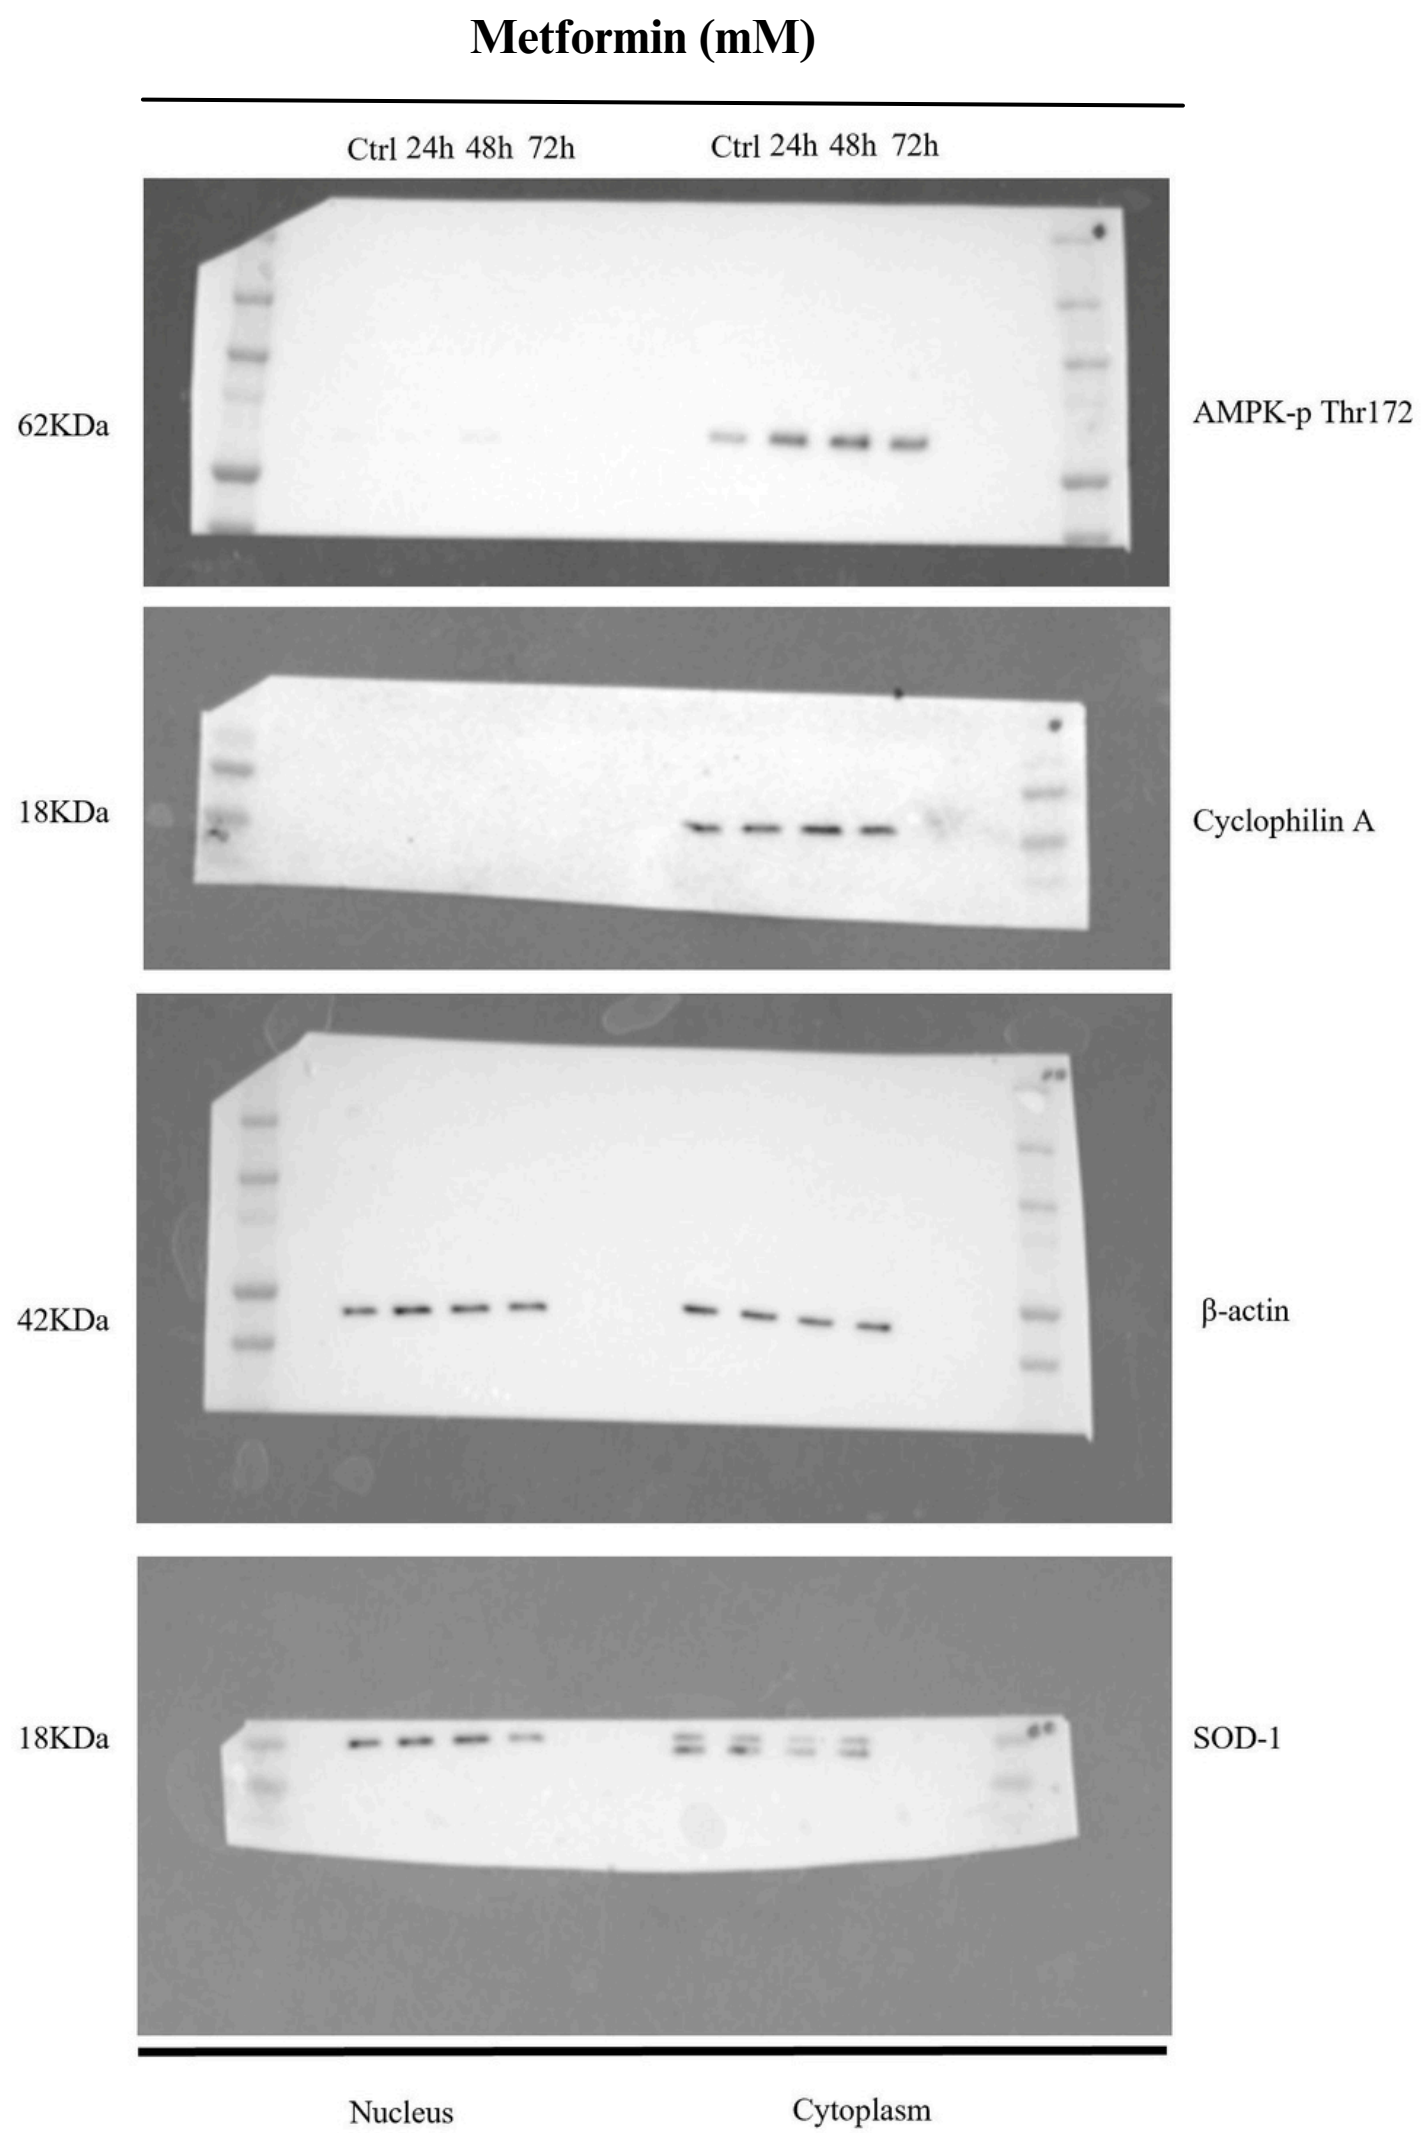

Fig 2A

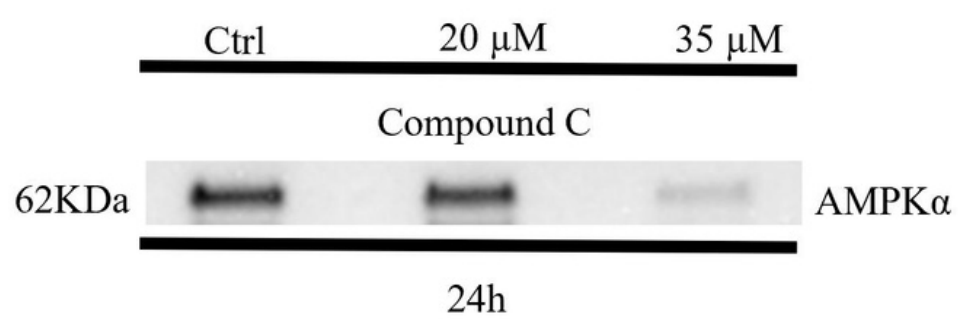

Original of Fig 2A

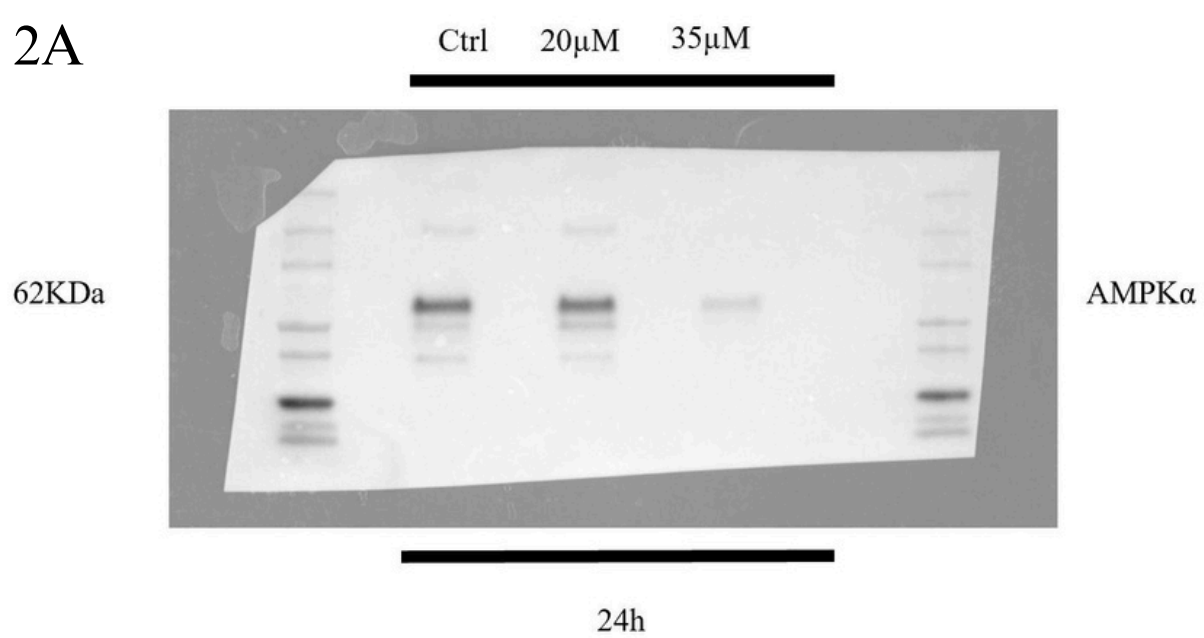

Fig 2B

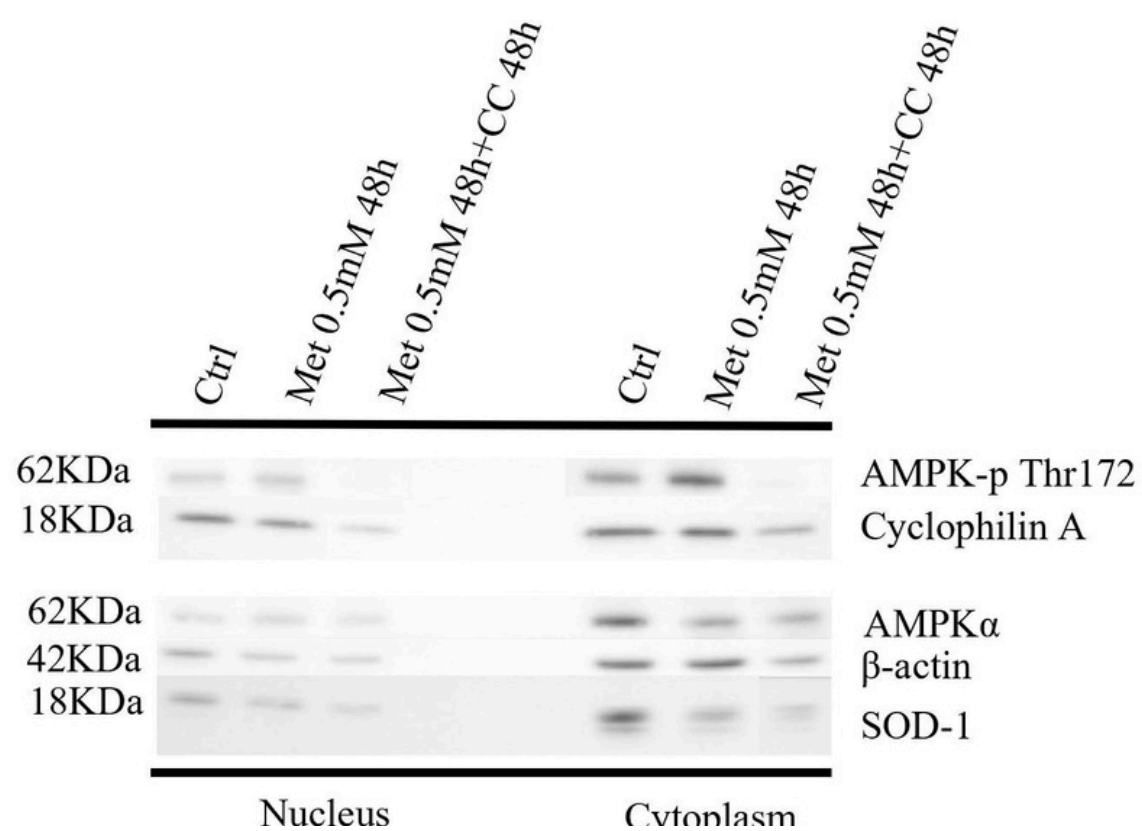

Original of Fig 2B

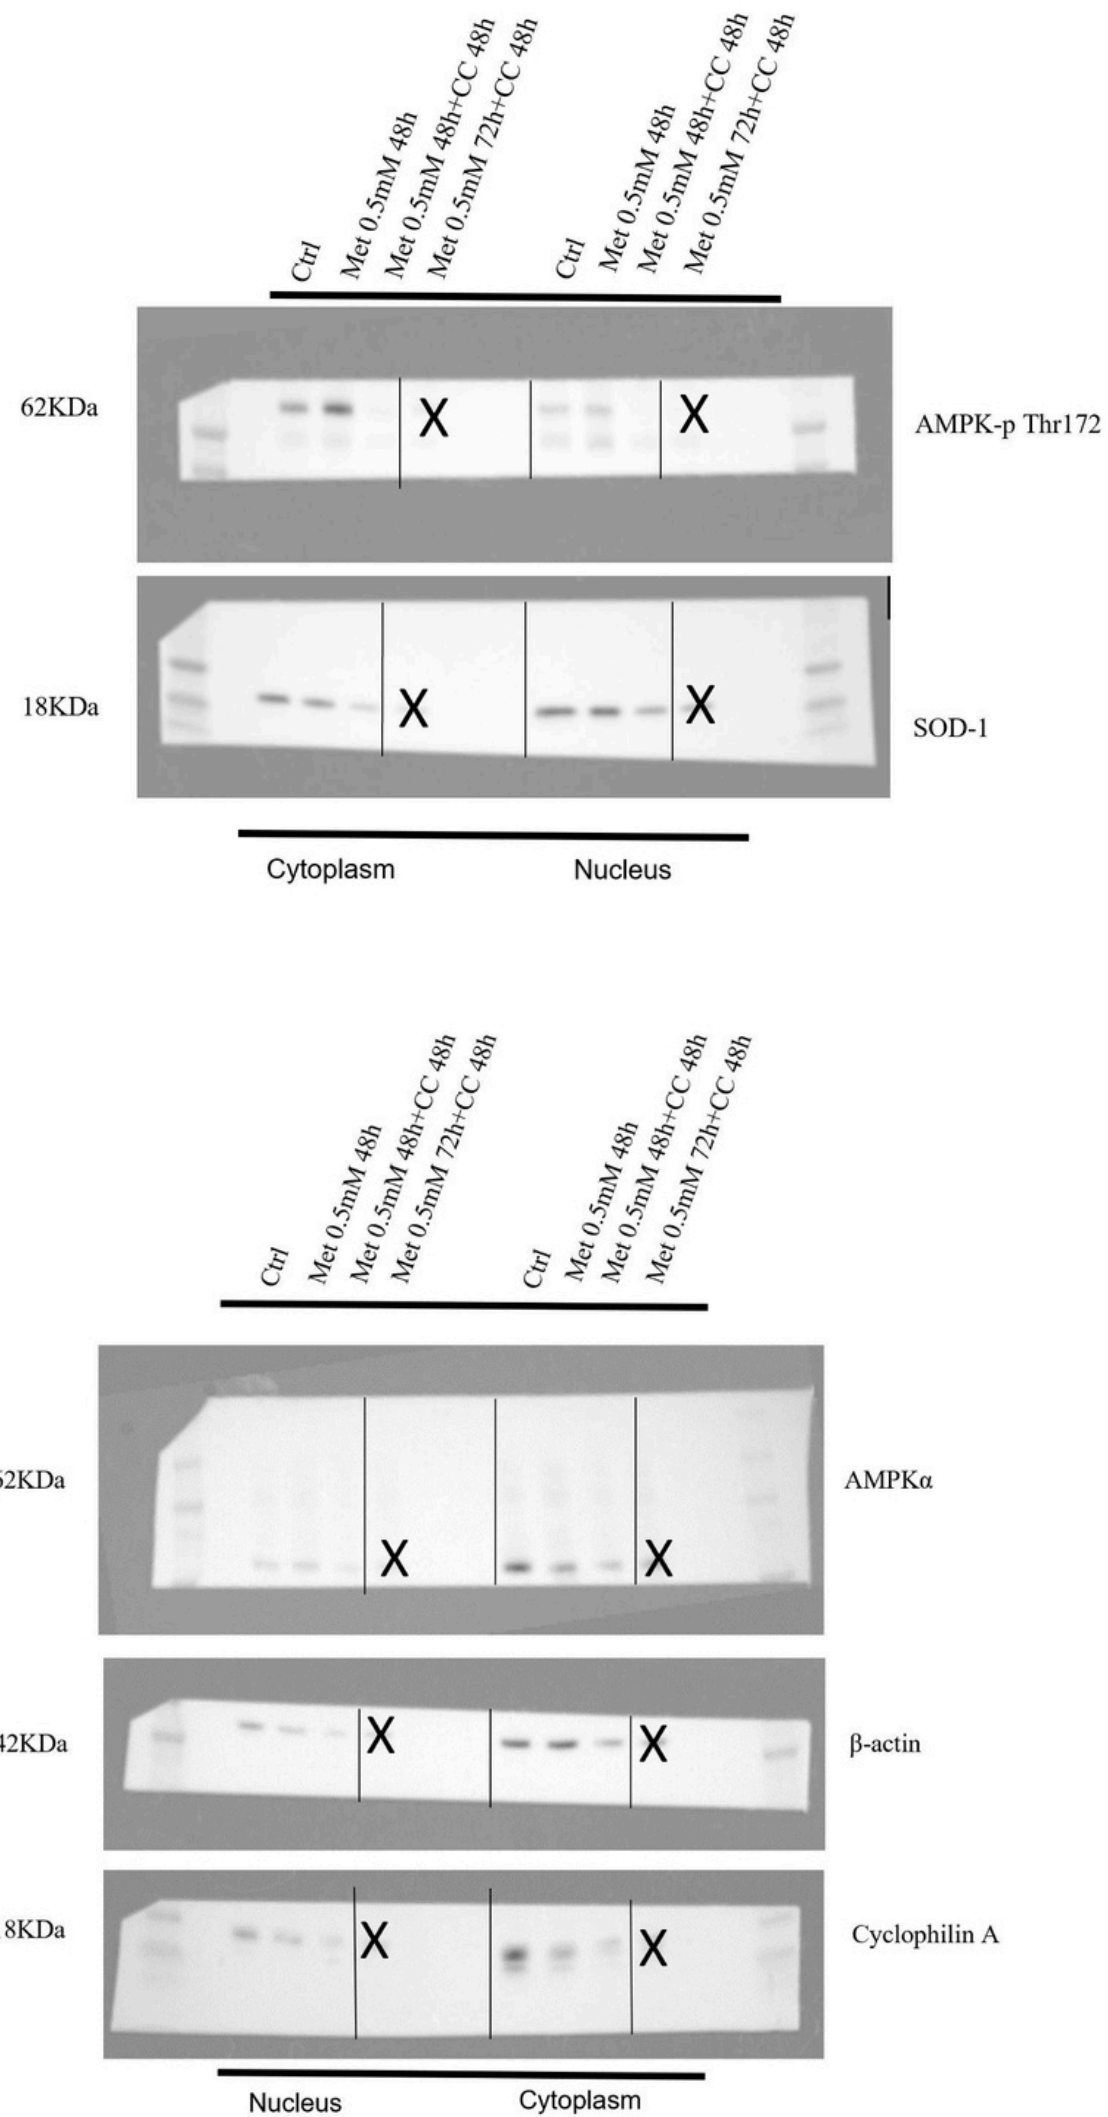

# S4A

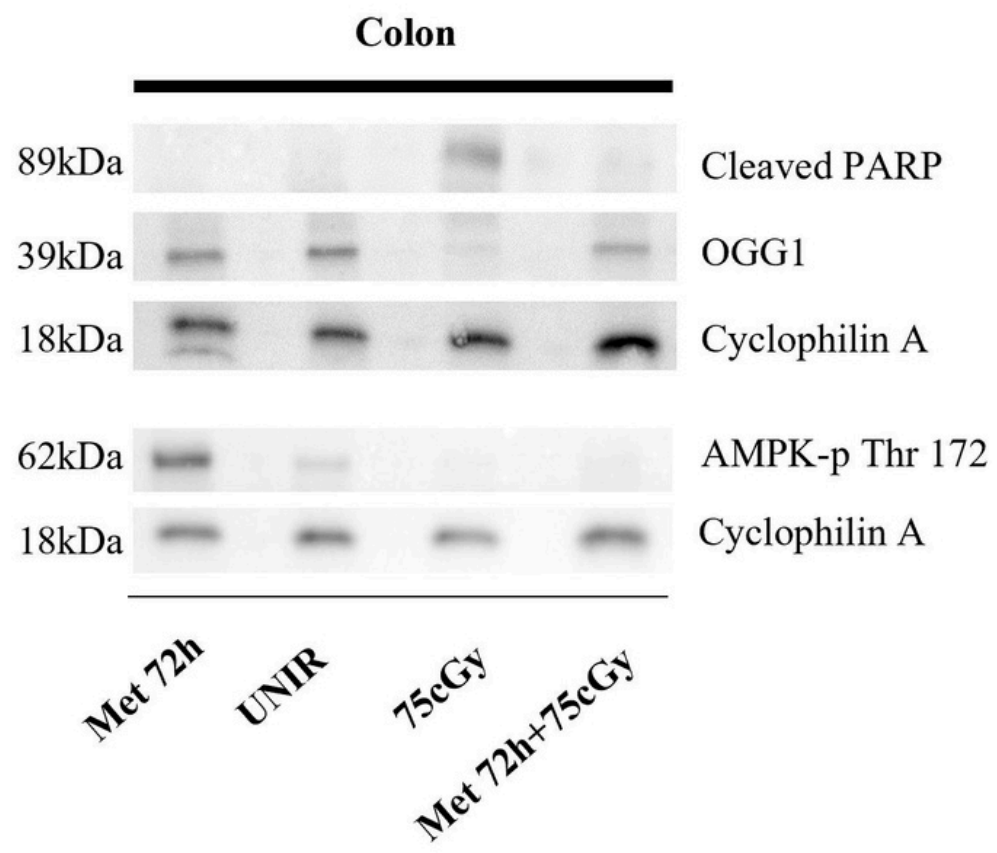

# Original of S4A

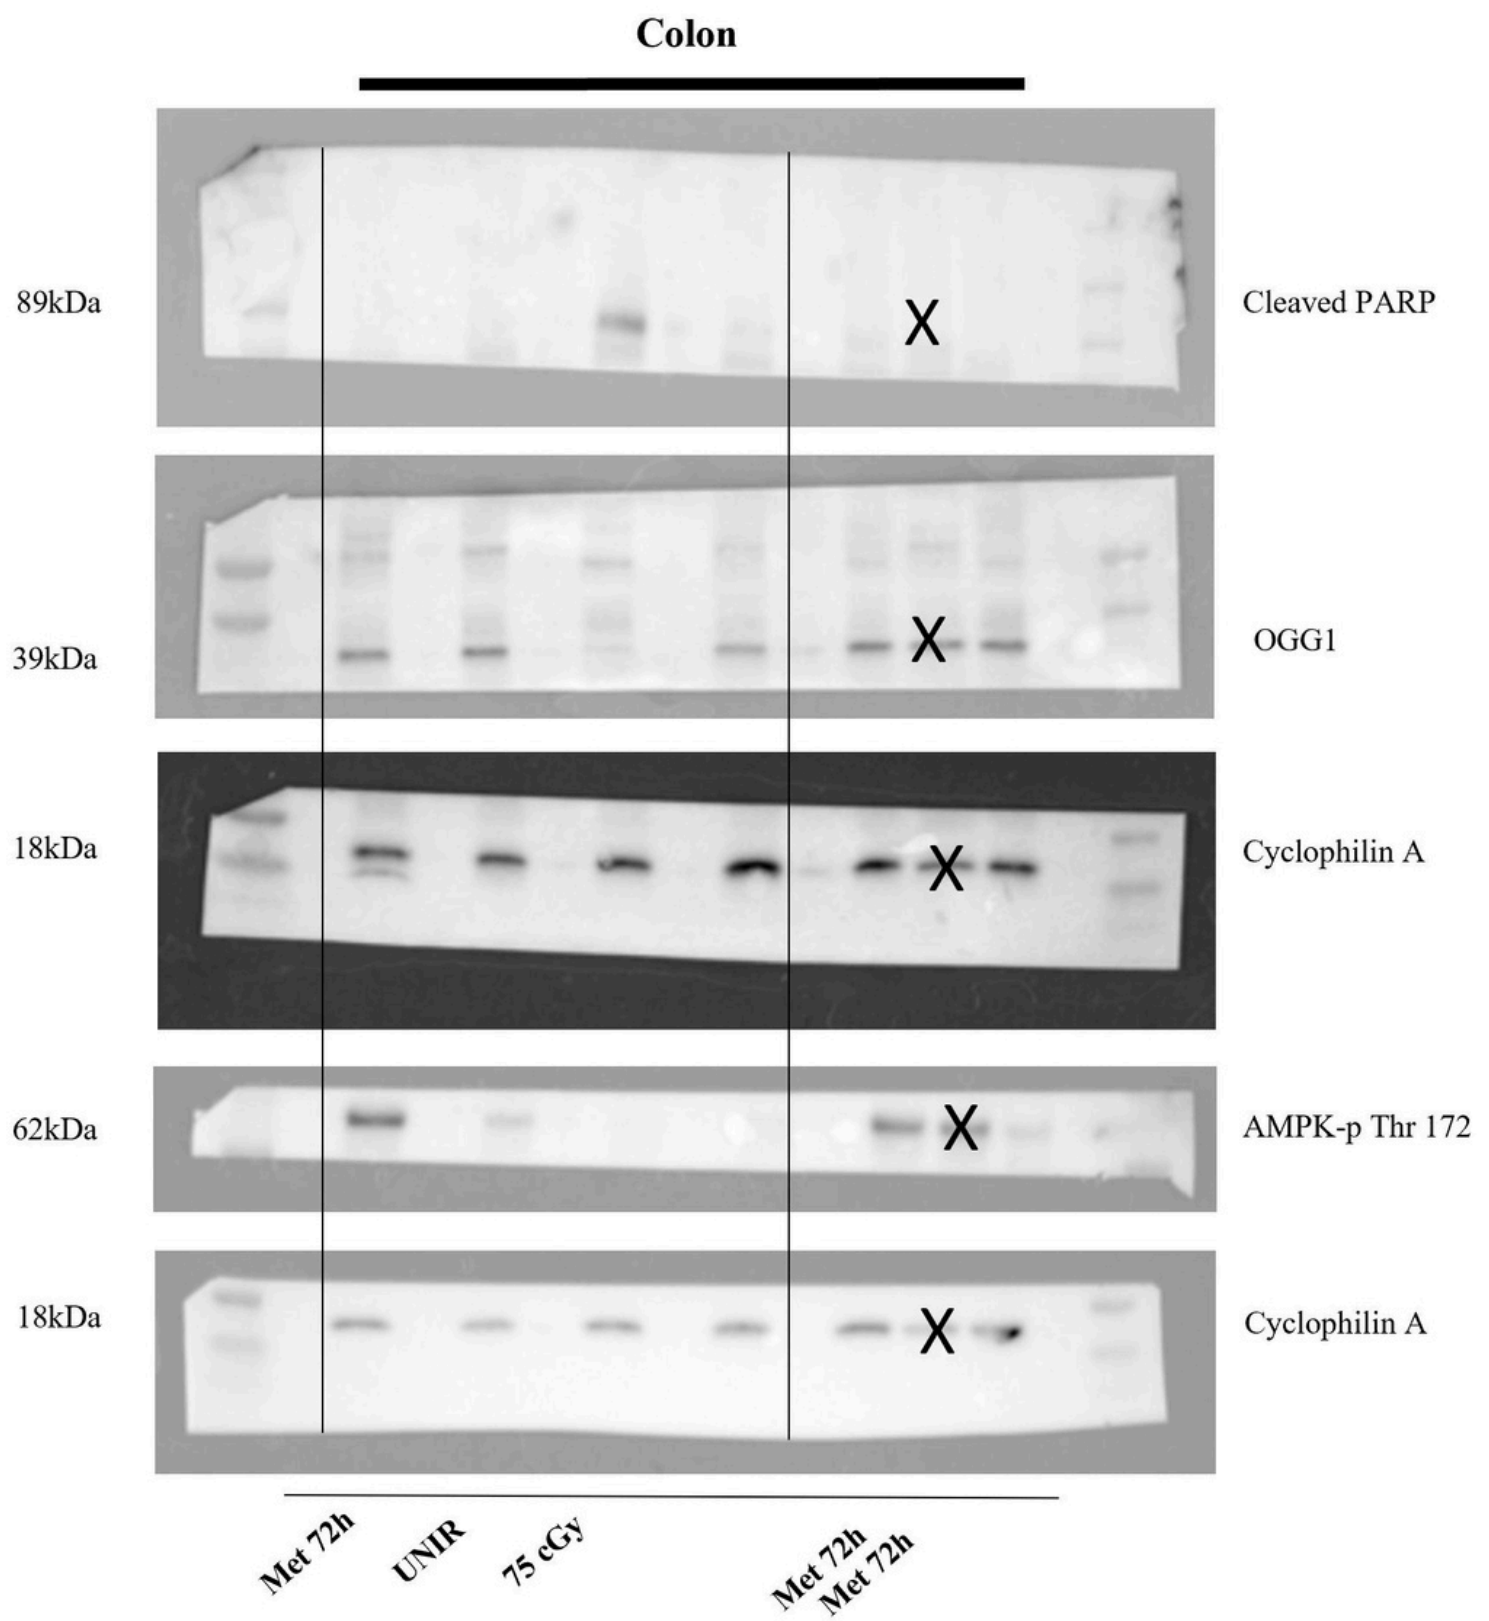

S4B

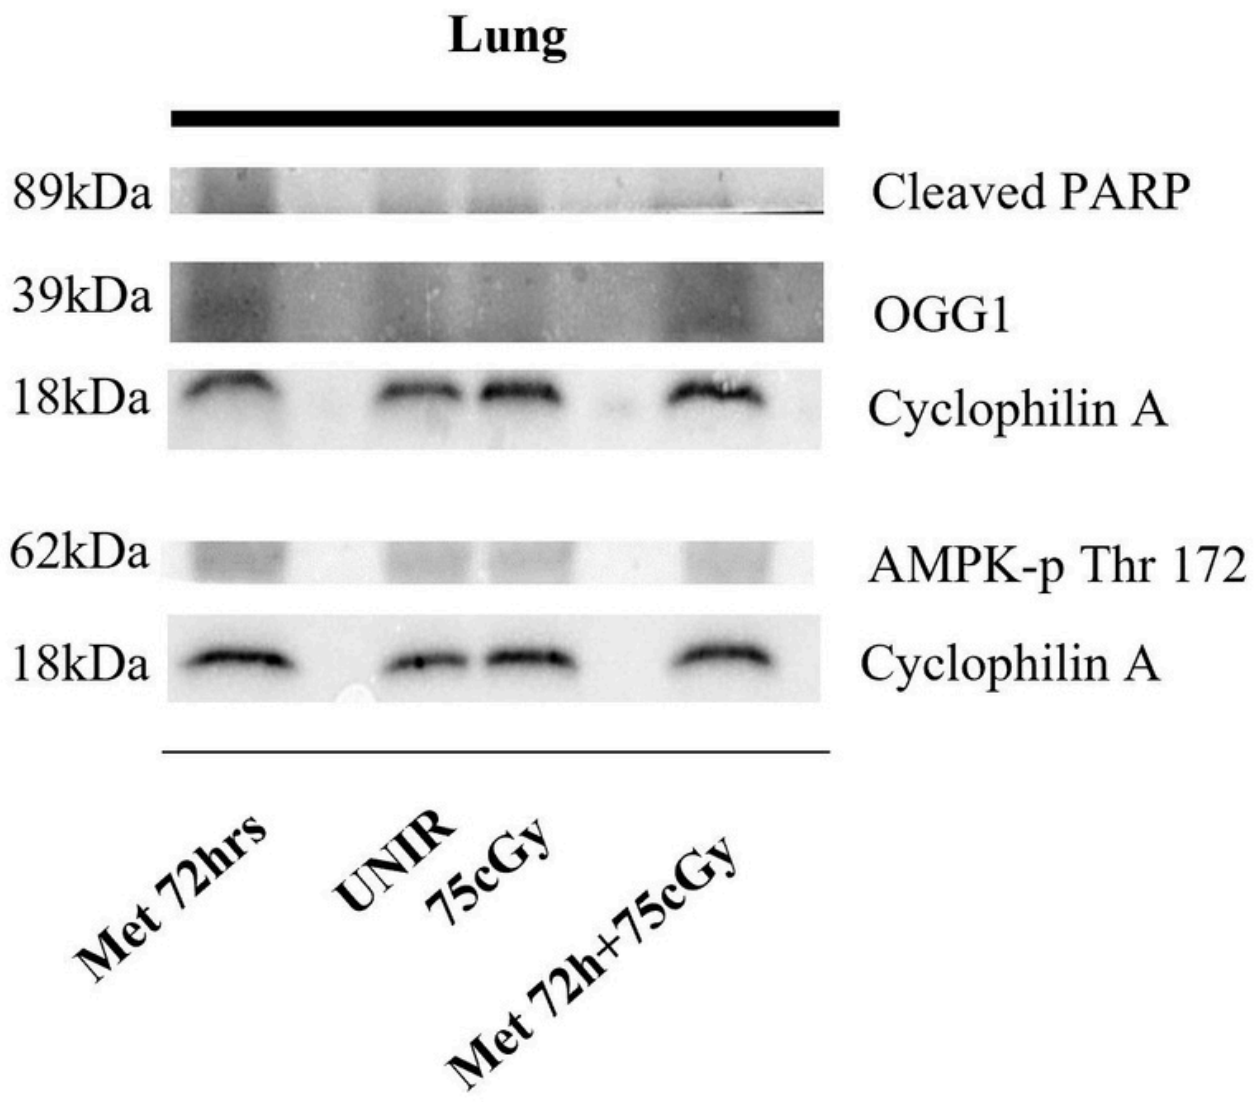

Original of S4B

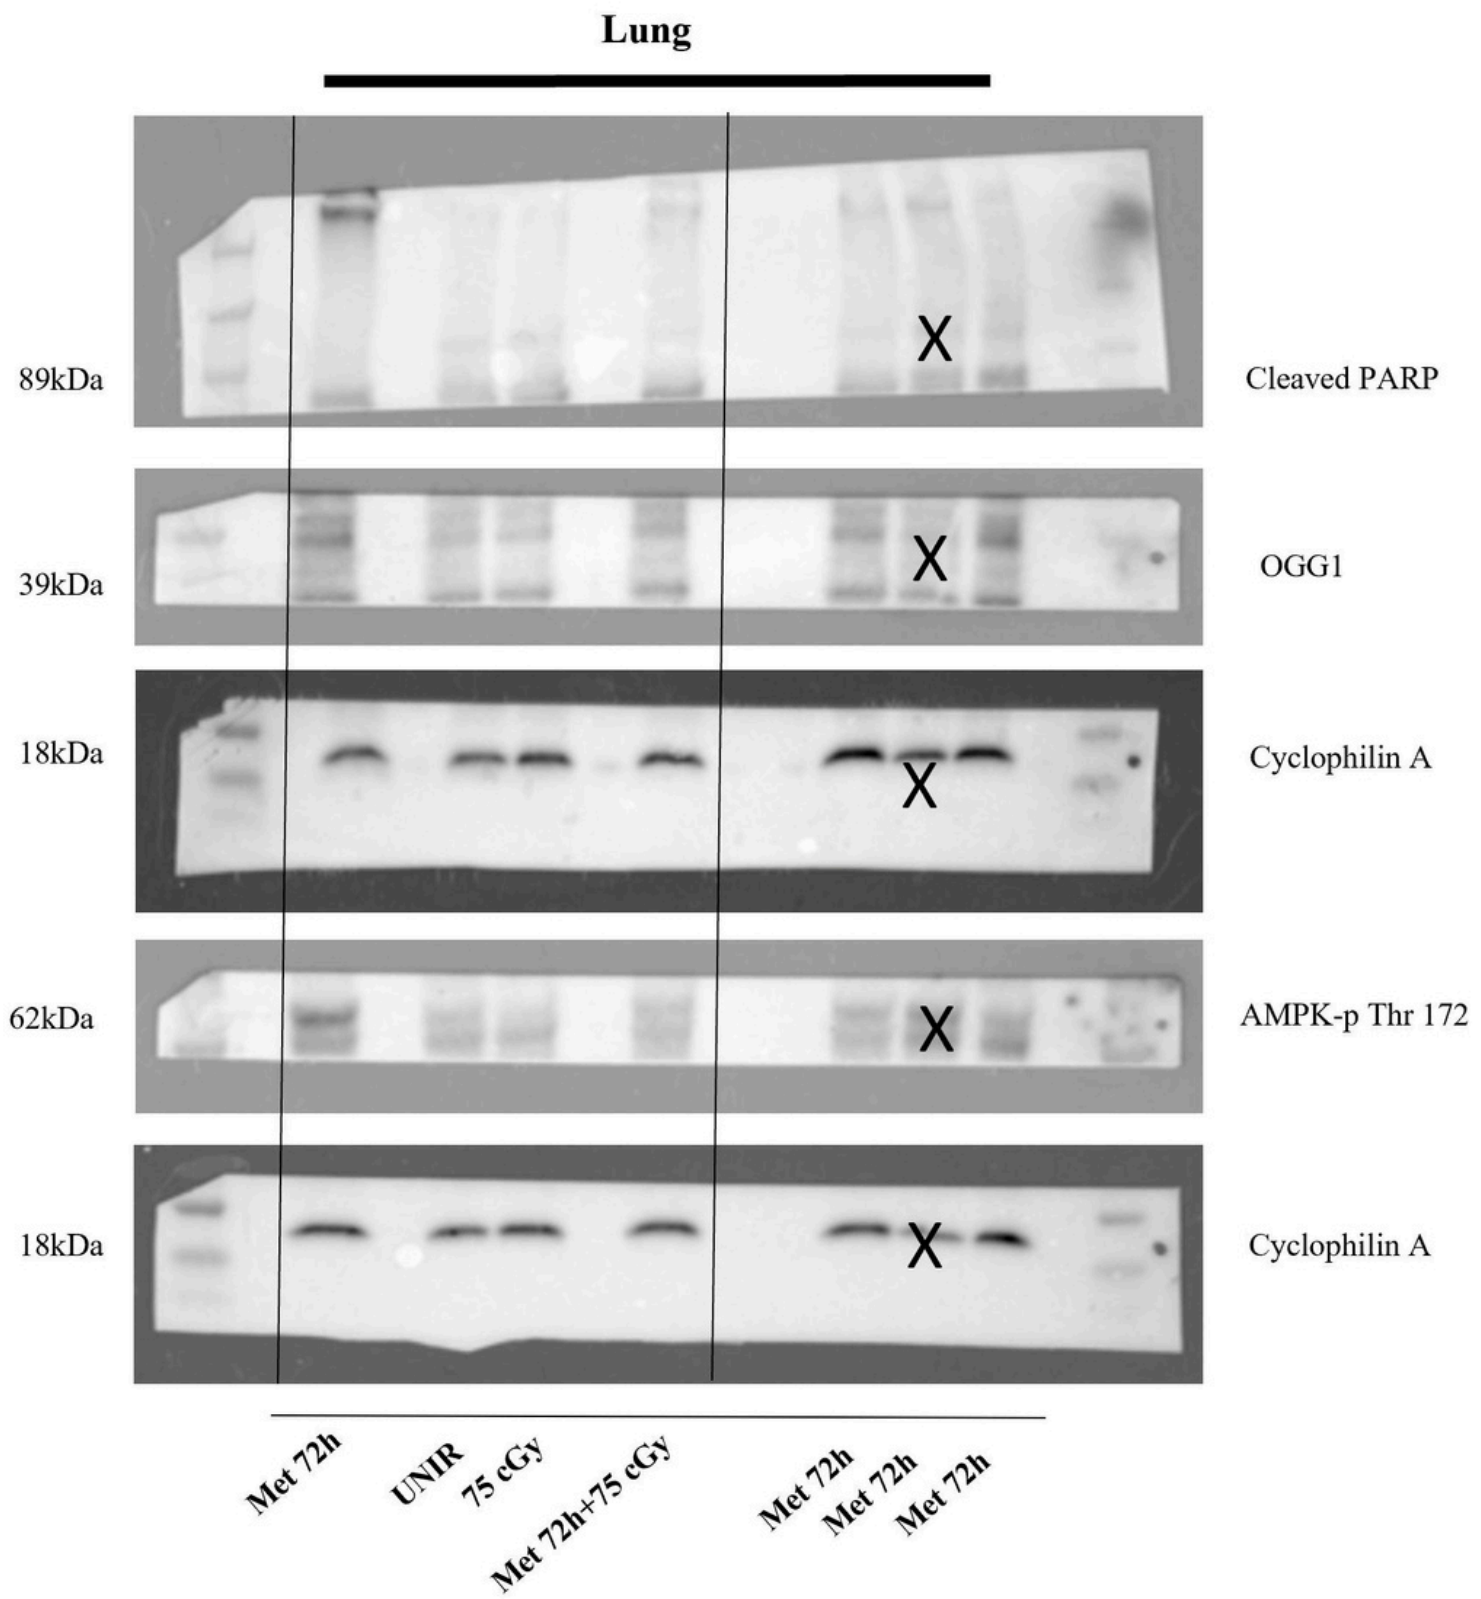

Supplement: pone.0307598.s001.pdf [file pone.0307598.s001.pdf]
